# Supplementary material for: Bu-Shen-Yi-Sui Capsule, an Herbal Medicine Formula, Promotes Remyelination by Modulating the Molecular Signals via Exosomes in Mice with Experimental Autoimmune Encephalomyelitis
Source: Hindawi journal article supplement (doi:10.1155/2020/7895293), 2020-07-22

# Graphical abstract

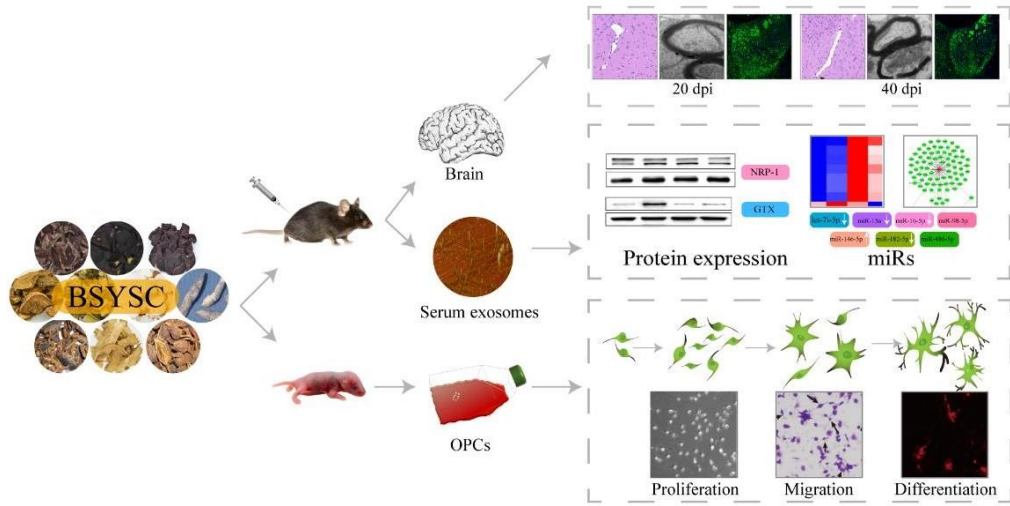

Supplement: f1 [file 7895293.f1.pdf]
